# Supplementary material for: High-Specificity CRISPR-Mediated Genome Engineering in Anti-BCMA Allogeneic CAR T Cells Suppresses Allograft Rejection in Preclinical Models
Source: PubMed Central journal article supplement — Cancer Immunol Res. 2024 Feb 8;12(4):462–77. doi: 10.1158/2326-6066.CIR-23-0679 (PMC10985478; doi:10.1158/2326-6066.cir-23-0679), 2024-02-08
Supplement: cir-23-0679_figure_s1.supps1.pdf [file cir-23-0679_figure_s1.supps1.pdf]

**Figure S1.** chRDNA-mediated gene editing did not result in any off-target editing above the limit of detection.

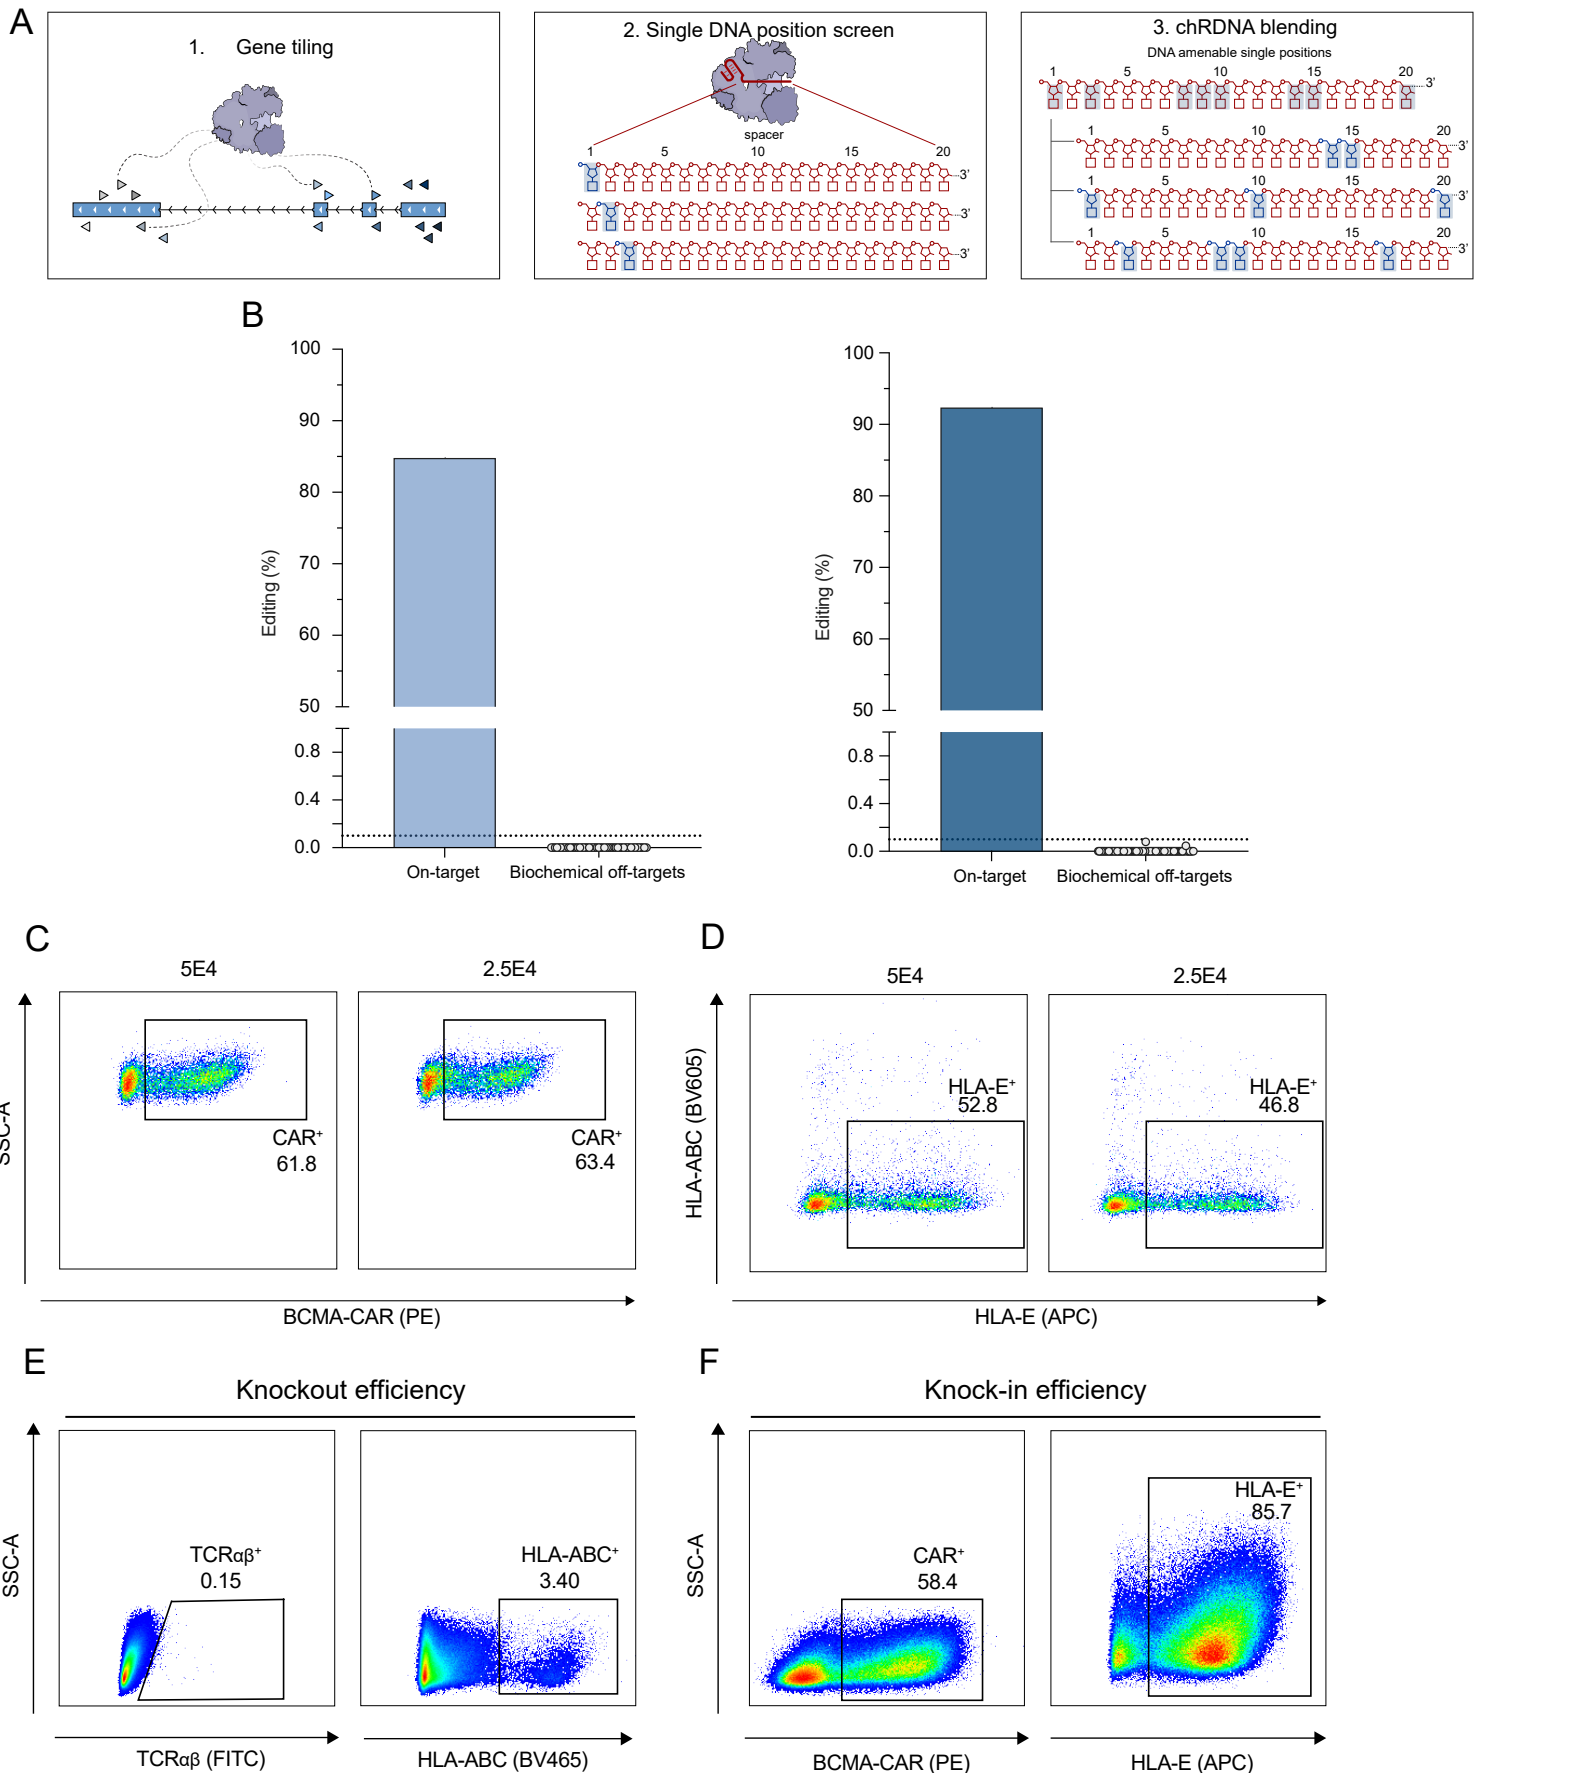

(A) Schematic representation of the chRDNA design process. (B, left panel) Editing rates of the optimized *TRAC* chRDNA at the *TRAC* locus on-target site and off-target sites detected in the biochemical SITE-Seq<sup>®</sup> assay, each point is the mean of 3 biological replicates, lower limit of detection 0.1% (dashed line). (B, right panel) Editing rates of optimized *B2M* chRDNA for the *B2M* on-target site and off-target sites detected in the biochemical SITE-Seq<sup>®</sup> assay, each point is the mean of 3 biological replicates, lower limit of detection 0.1% (dashed line). (C) Dot plots of BCMA-CAR transgene insertion with AAV MOI titration. (D) Dot plots of B2M-HLA-E fusion protein transgene insertion with AAV MOI titration. (E) Representative dot plots of the TCR $\alpha\beta$  and HLA-ABC<sup>-</sup> knockout efficiencies of the drug product. (F) Representative dot plots of the BCMA-CAR transgene and B2M-HLA-E fusion protein knock-in efficiencies.

AAV, adeno-associated virus; B2M, beta-2 microglobulin; BCMA, B cell maturation antigen; CAR, chimeric antigen receptor; chRDNA, CRISPR hybrid RNA-DNA; HLA, human leukocyte antigen; MOI, multiplicity of infection; TRAC, T cell receptor alpha constant.
