# Supplementary material for: High-Specificity CRISPR-Mediated Genome Engineering in Anti-BCMA Allogeneic CAR T Cells Suppresses Allograft Rejection in Preclinical Models
Source: PubMed Central journal article supplement — Cancer Immunol Res. 2024 Feb 8;12(4):462–77. doi: 10.1158/2326-6066.CIR-23-0679 (PMC10985478; doi:10.1158/2326-6066.cir-23-0679), 2024-02-08
Supplement: cir-23-0679_figure_s2.supps2.pdf [file cir-23-0679_figure_s2.supps2.pdf]

**Figure S2.** *In vitro* serial rechallenge assay demonstrates long-term cytotoxicity activity of CB-011 against BCMA<sup>+</sup> tumor cells.

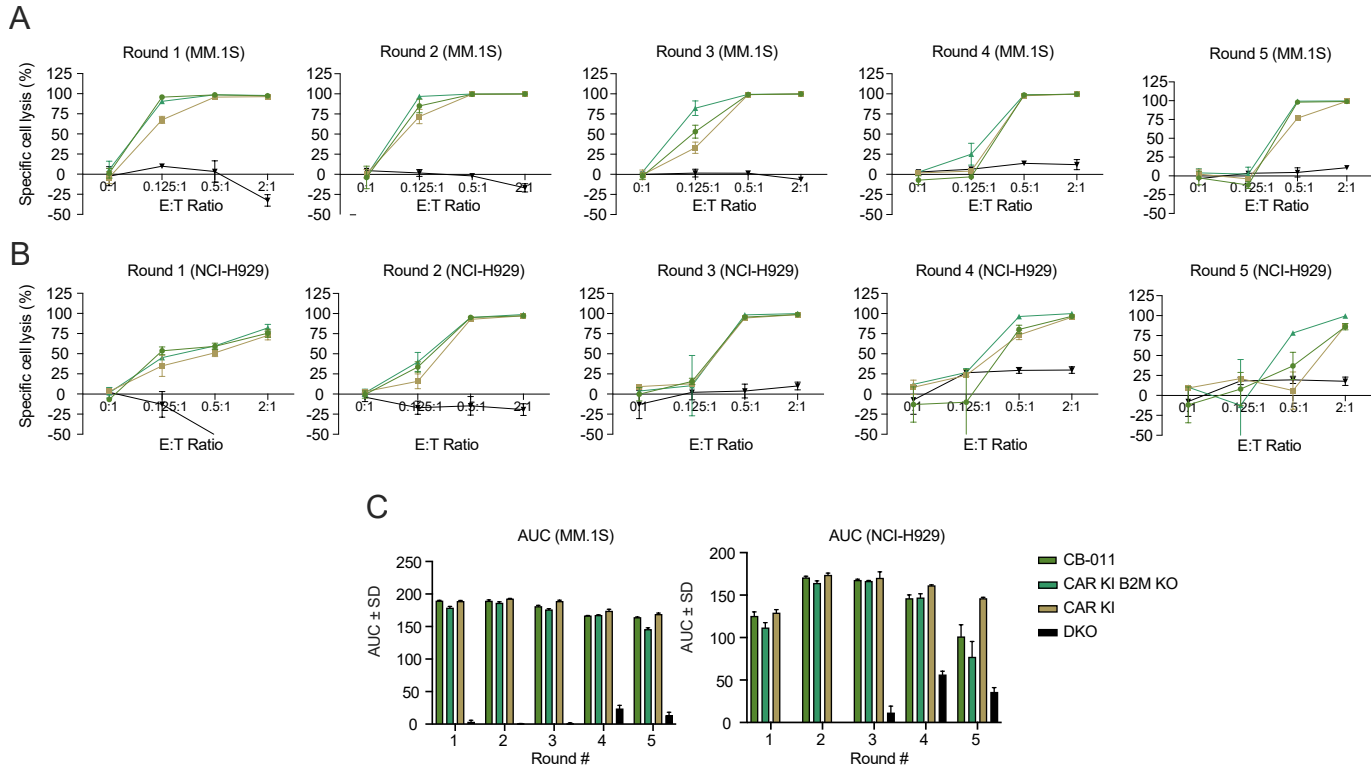

Serial rechallenge assay at a range of E:T ratios of CB-011, DKO, CAR KI and CAR KI B2M KO T cells against BCMA<sup>+</sup> cell lines MM.1S (A) and NCI-H929 (B). (C) AUC of data in panels A and B (x-axis [E:T ratios] vs y-axis [percentage of specific lysis from round 1 to 5]). Shown are mean values ± SEM from 3 replicates.

AUC, area under the curve; B2M, beta-2 microglobulin; BCMA, B cell maturation antigen; CAR, chimeric antigen receptor; DKO, double knockout; KI, knock-in; KO, knockout; E:T, effector to target; R, round.
