# Supplementary material for: High-Specificity CRISPR-Mediated Genome Engineering in Anti-BCMA Allogeneic CAR T Cells Suppresses Allograft Rejection in Preclinical Models
Source: PubMed Central journal article supplement — Cancer Immunol Res. 2024 Feb 8;12(4):462–77. doi: 10.1158/2326-6066.CIR-23-0679 (PMC10985478; doi:10.1158/2326-6066.cir-23-0679), 2024-02-08
Supplement: cir-23-0679_figure_s4.supps4.pdf [file cir-23-0679_figure_s4.supps4.pdf]

**Figure S4.** Gamma-secretase inhibitor RO4929097 increases BCMA expression on-target cell lines but does not improve CB-011 antitumor efficacy.

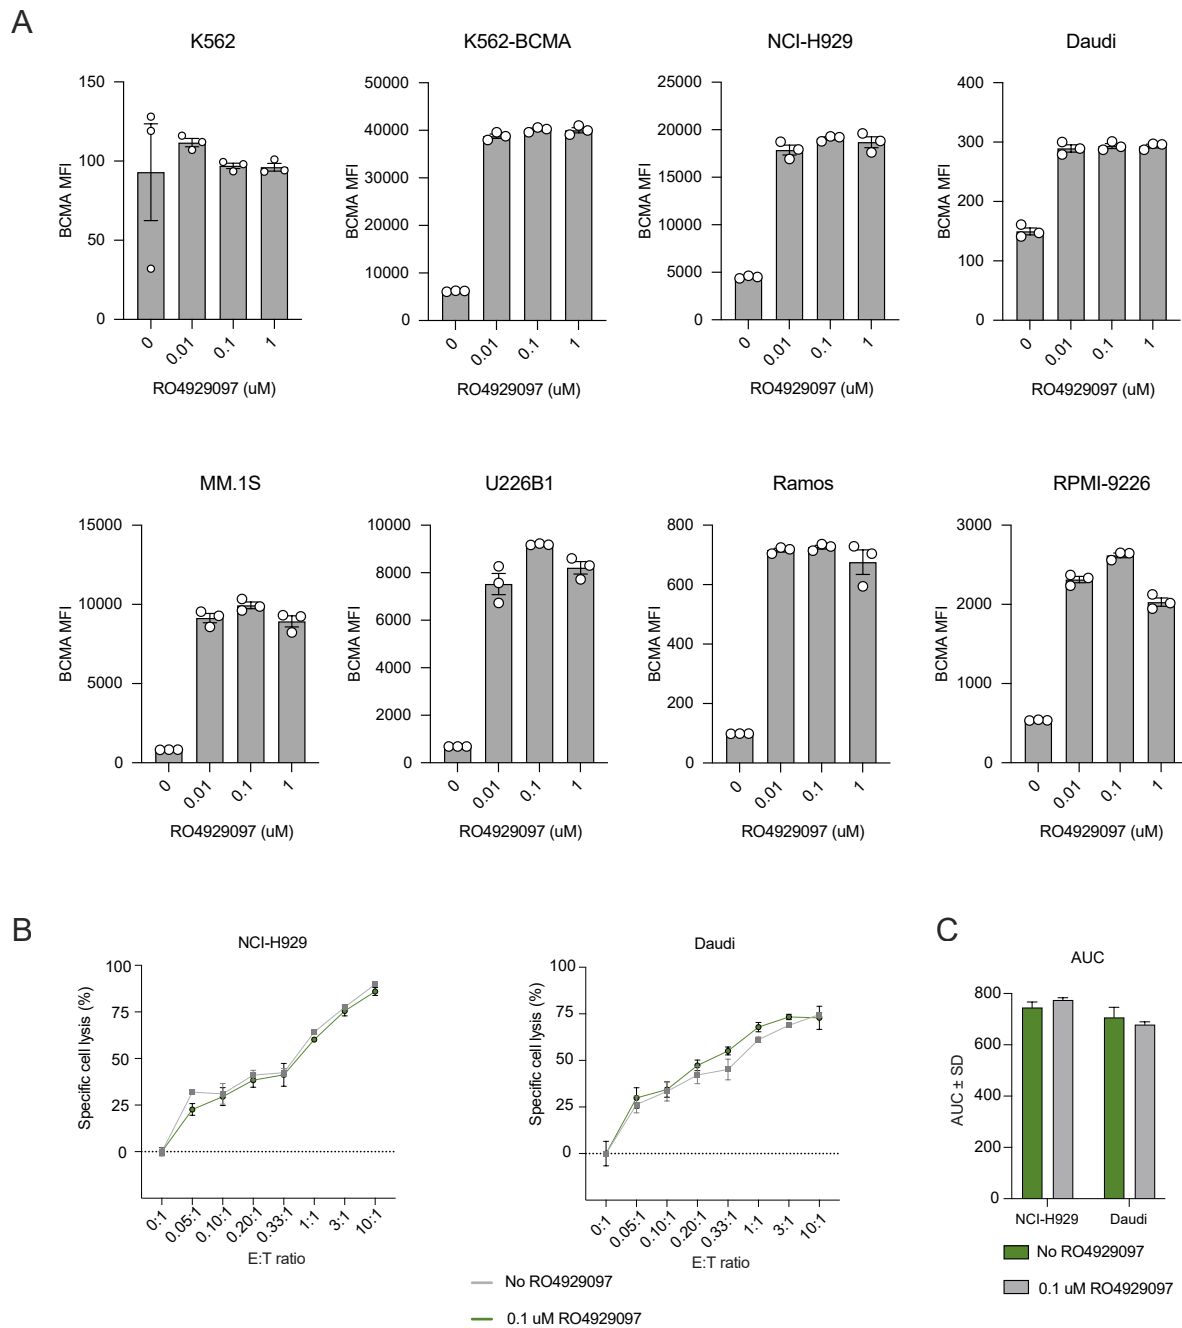

BCMA<sup>-</sup> K562 and BCMA<sup>+</sup> K562, NCI-H929, Daudi, MM.1S, U226B1, Ramos, and RPMI-8226 were treated with increasing concentrations of RO4929097 for 24 hours. (A) BCMA geometric mean (MFI) of target cells treated with RO4929097. (B) A 24-hour T cell cytotoxicity assay at a range of E:T ratios of CB-011 or DKO (negative T cell control) against BCMA-positive cell lines NCI-H929 and Daudi treated or not with RO4929097. (C) The AUC of data in panel B (x-axis [E:T ratios] vs y-axis [percentage of specific cell lysis]). AUC, area under the curve; BCMA, B cell maturation antigen; DKO, double knockout; E:T, effector to target; MFI, median fluorescence intensity.
