# Supplementary material for: High-Specificity CRISPR-Mediated Genome Engineering in Anti-BCMA Allogeneic CAR T Cells Suppresses Allograft Rejection in Preclinical Models
Source: PubMed Central journal article supplement — Cancer Immunol Res. 2024 Feb 8;12(4):462–77. doi: 10.1158/2326-6066.CIR-23-0679 (PMC10985478; doi:10.1158/2326-6066.cir-23-0679), 2024-02-08
Supplement: cir-23-0679_figure_s5.supps5.pdf [file cir-23-0679_figure_s5.supps5.pdf]

**Figure S5.** Antitumor activity of CB-011 CAR-T cells in a xenograft model of multiple myeloma.

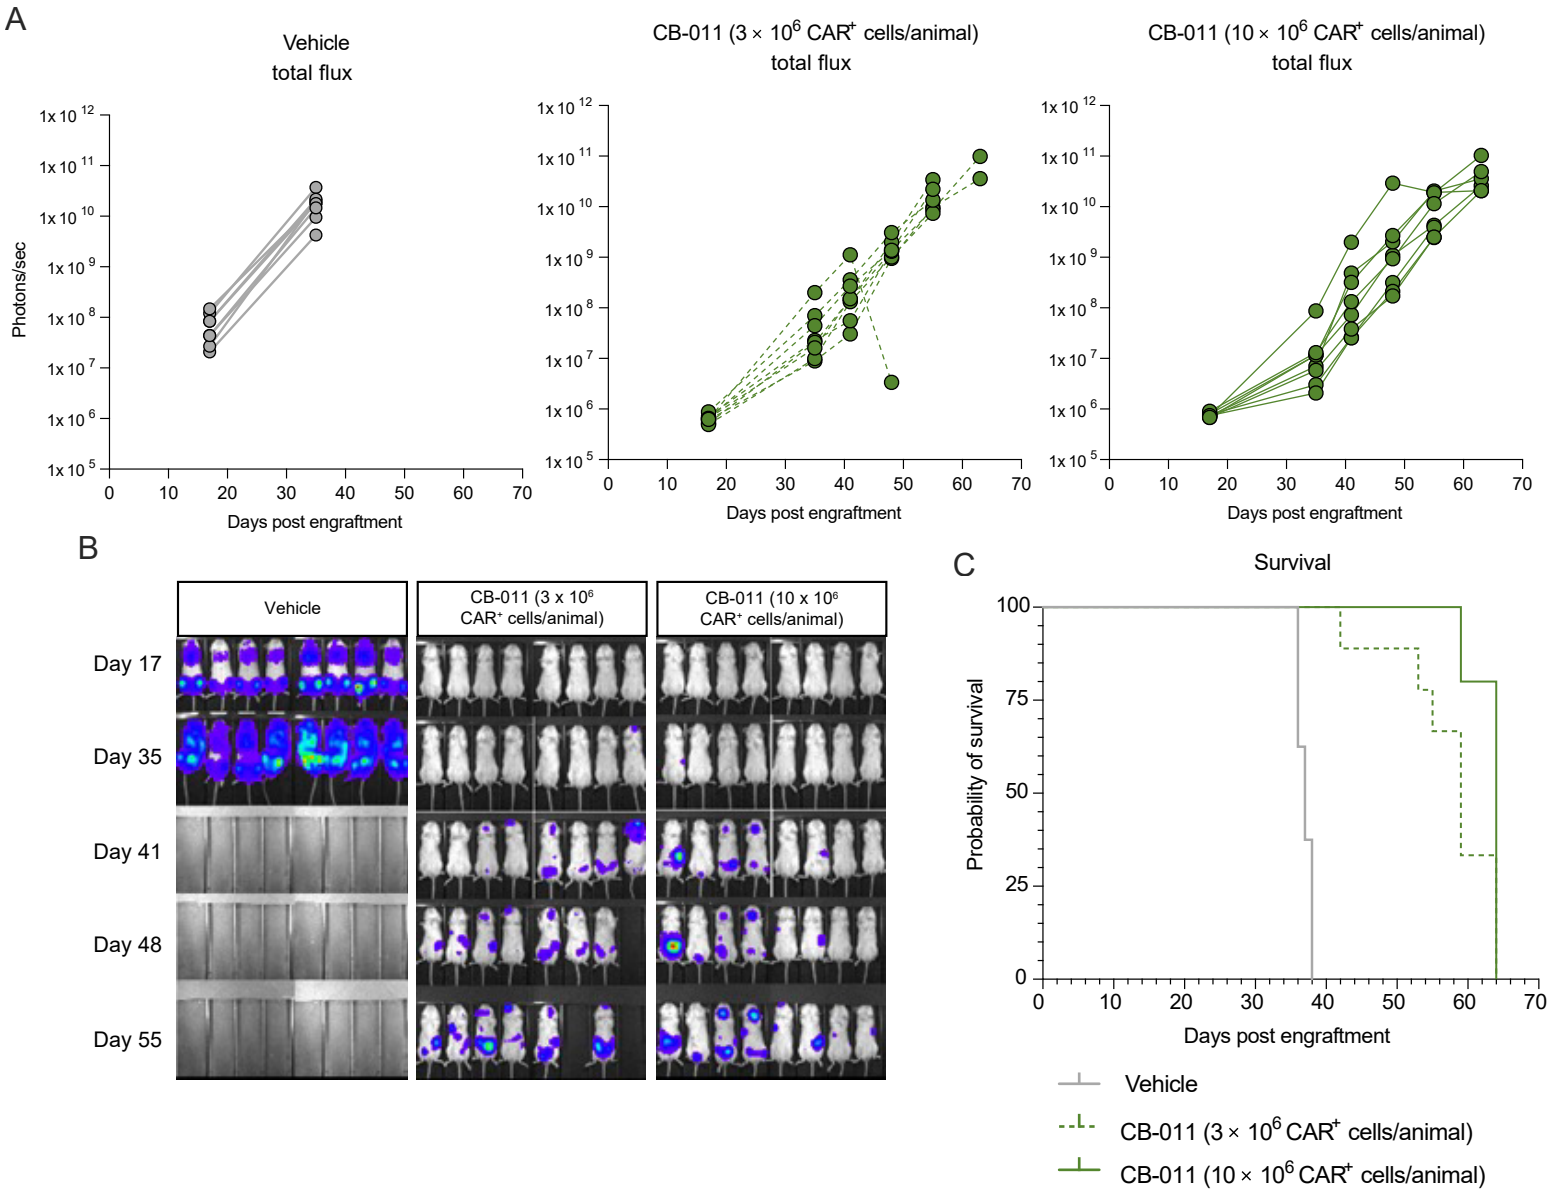

MM.1S-GFP-Luc<sup>+</sup> multiple myeloma tumor cells were engrafted intravenously in NSG mice on day 0, and a single bolus dose of (A, left panel) vehicle, (A, center panel) low dose CB-011, or (A, right panel) high dose CB-011 was administered intravenously on day 3 at the cell dose indicated. Bioluminescence imaging was performed using an IVIS® Spectrum system. (A) Lines represent individual animal bioluminescent intensity for each group. Mice were administered a low dose,  $3 \times 10^6$  CAR<sup>+</sup> cells/animal, or a high dose,  $10 \times 10^6$  CAR<sup>+</sup> cells/animal. (B) IVIS images show tumor burden for each animal on different days following engraftment. No animals in the vehicle control group survived beyond day 35. Missing animals in the CAR-T cell-treated groups indicate deaths. (C) Kaplan-Meier survival plot representing percent survival for each group post tumor engraftment. Median survival: vehicle, 37 days; CB-011 ( $3 \times 10^6$  CAR<sup>+</sup> T cells/animal), 59 days ( $P < 0.0001$  vs vehicle); CB-011 ( $10 \times 10^6$  CAR<sup>+</sup> T cells/animal), 64 days ( $P < 0.0001$  vs vehicle). Low dose,  $3 \times 10^6$  CAR<sup>+</sup> cells/animal; high dose,  $10 \times 10^6$  CAR<sup>+</sup> cells/animal. CAR, chimeric antigen receptor; GFP, green fluorescent protein; LUC, luciferase; max, maximum; min, minimum; NSG, NOD-scid IL2Rgamma<sup>null</sup>; p, photons; sr, steradian.
