# Supplementary material for: High-Specificity CRISPR-Mediated Genome Engineering in Anti-BCMA Allogeneic CAR T Cells Suppresses Allograft Rejection in Preclinical Models
Source: PubMed Central journal article supplement — Cancer Immunol Res. 2024 Feb 8;12(4):462–77. doi: 10.1158/2326-6066.CIR-23-0679 (PMC10985478; doi:10.1158/2326-6066.cir-23-0679), 2024-02-08
Supplement: cir-23-0679_figure_s6.supps6.pdf [file cir-23-0679_figure_s6.supps6.pdf]

**Figure S6.** Antitumor activity of CB-011 CAR-T cells in a xenograft model of multiple myeloma.

**A**

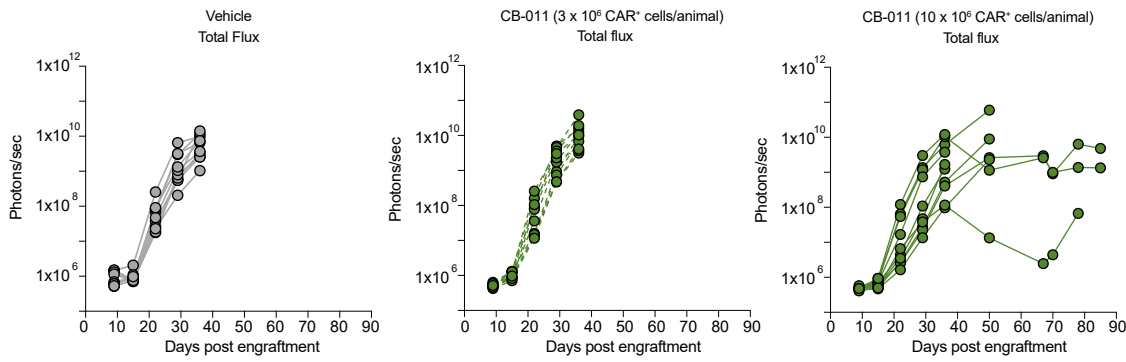

**B**

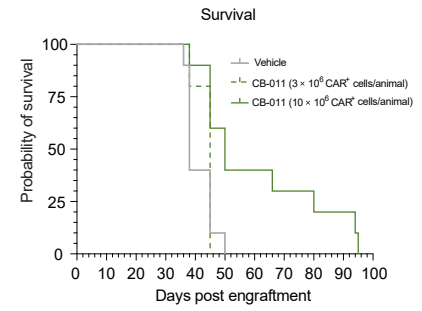

NCI-H929-GFP-Luc<sup>+</sup> multiple myeloma tumor cells were injected intravenously in NSG mice on day 0 and a single bolus dose of (A, left panel) vehicle, (A, center panel) low-dose CB-011, or (A, right panel) high-dose CB-011 was administered intravenously on day 3 at the cell dose indicated. Bioluminescence imaging was performed using an IVIS® Spectrum system. (A) Lines representing individual animal bioluminescent intensity for each group. (B) Kaplan-Meier survival plot representing percent survival for each group post tumor engraftment. Median survival: vehicle, 38 days; CB-011 ( $3 \times 10^6$  CAR<sup>+</sup> T cells/animal), 45 days ( $P = 0.2354$  vs vehicle); CB-011 ( $10 \times 10^6$  CAR<sup>+</sup> T cells/animal), 50 days ( $P = 0.004$  vs vehicle).

Low dose,  $3 \times 10^6$  CAR<sup>+</sup> cells/animal; high dose,  $10 \times 10^6$  CAR<sup>+</sup> cells/animal.

CAR, chimeric antigen receptor; GFP, green fluorescent protein; LUC, luciferase; NSG, NOD-scid IL2Rgamma<sup>null</sup>.
