# Supplementary material for: High-Specificity CRISPR-Mediated Genome Engineering in Anti-BCMA Allogeneic CAR T Cells Suppresses Allograft Rejection in Preclinical Models
Source: PubMed Central journal article supplement — Cancer Immunol Res. 2024 Feb 8;12(4):462–77. doi: 10.1158/2326-6066.CIR-23-0679 (PMC10985478; doi:10.1158/2326-6066.cir-23-0679), 2024-02-08
Supplement: cir-23-0679_figure_s7.supps7.pdf [file cir-23-0679_figure_s7.supps7.pdf]

**Figure S7.** CB-011 immune-cloaking armoring strategy suppresses cytotoxic T and NK cell-mediated allograft rejection.

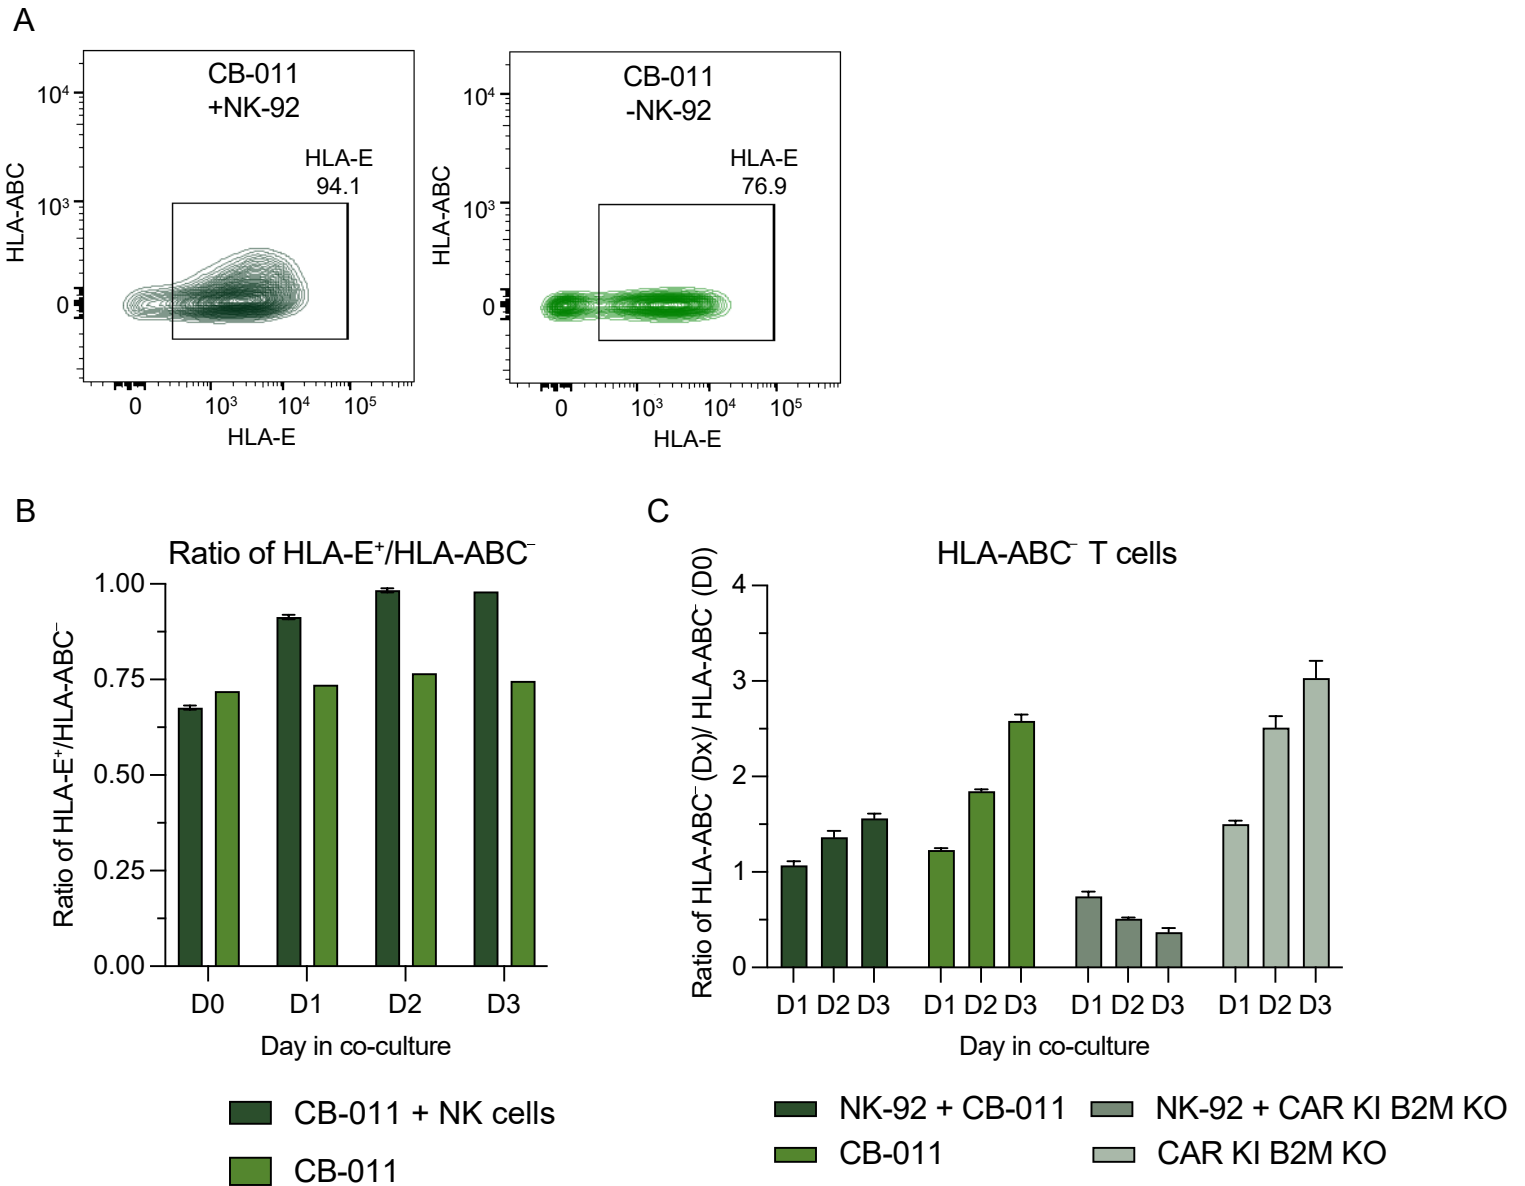

CB-011 cells were co-cultured with NK-92 cells at a 1:1 ratio in presence of IL-2. The percentage of HLA-E<sup>+</sup> and HLA-E<sup>-</sup> CB-011 cells were monitored over time. (A) Dot plots representing the percentage of the CB-011 HLA-E<sup>+</sup> population in presence (left panel) or absence (right panel) of NK-92 cells. The HLA-ABC<sup>-</sup> population represents a surrogate marker to identify the B2M KO population. (B) The ratio of HLA-E<sup>+</sup> CB-011 CAR-T cells within this population over 3 days of culture in the presence or absence of NK-92 cells is shown. In the absence of NK cells, the HLA-E<sup>+</sup> population was stable indicating no intrinsic survival advantage. In the presence of NK cells, the HLA-E<sup>+</sup>ABC<sup>-</sup> population increased demonstrating protection of the HLA-E fusion expressing population from NK cell-mediated cytotoxicity. (C) CB-011 or CAR-T cells with a B2M KO without HLA-E fusion engineering (CAR KI B2M KO) were cultured in media supplemented with IL-2 in the presence or absence of NK cells. In the absence of NK cells, IL-2 supplemented T cells increased. In the presence of NK cells, T cells engineered without the HLA-E fusion were susceptible to NK cell-mediated lysis and numbers decline while CB-011 CAR-T cells were resistant. B2M, beta-2 microglobulin; CAR, chimeric antigen receptor; D, day; HLA, human leukocyte antigen; IL-2, interleukin 2; KI, knock-in; KO, knockout; NK, natural killer.
